# Supplementary material
Source: PubMed Central journal article supplement (PMC8214478)
Supplement: NIHMS1704093-supplement-sm.pdf [file NIHMS1704093-supplement-sm.pdf]

# Supporting Information to “Efficient Semiparametric Inference for Two-Phase Studies with Outcome and Covariate Measurement Errors”

Ran Tao<sup>1,2</sup>, Sarah C. Lotspeich<sup>1</sup>, Gustavo Amorim<sup>1</sup>, Pamela A. Shaw<sup>3</sup>,  
and Bryan E. Shepherd<sup>1</sup>

<sup>1</sup>Department of Biostatistics, Vanderbilt University Medical Center,  
Nashville, Tennessee 37232, U.S.A.

<sup>2</sup>Vanderbilt Genetics Institute, Vanderbilt University Medical Center,  
Nashville, Tennessee 37232, U.S.A.

<sup>3</sup>Department of Biostatistics, Epidemiology, and Informatics, Perelman  
School of Medicine, University of Pennsylvania, Philadelphia,  
Pennsylvania 19104, U.S.A.

Table S1. Simulation results for LSE under additive errors in  $Y^*$  and  $X^*$  when simple random sampling is used in the second phase. Bias and SE are, respectively, the empirical bias and standard error of the parameter estimator; SEE is the empirical mean of the standard error estimator; CP is the coverage probability of the 95% confidence interval; and RE is the efficiency of LSE relative to that of the other three methods. Each entry is based on 10,000 replicates

| $r$  | $p$ | Bias  | SE    | SEE   | CP    | RE    |       |       |
|------|-----|-------|-------|-------|-------|-------|-------|-------|
|      |     |       |       |       |       | MBE   | CCE   | SMLE  |
| -0.5 | 0.1 | 0.000 | 0.050 | 0.050 | 0.949 | 0.665 | 0.592 | 0.497 |
|      | 0.3 | 0.000 | 0.050 | 0.050 | 0.949 | 1.059 | 0.735 | 0.592 |
|      | 0.6 | 0.000 | 0.050 | 0.050 | 0.949 | 1.552 | 0.818 | 0.700 |
|      | 1.0 | 0.000 | 0.050 | 0.050 | 0.950 | 2.094 | 0.860 | 0.824 |
| -0.3 | 0.1 | 0.000 | 0.050 | 0.050 | 0.949 | 0.622 | 0.573 | 0.498 |
|      | 0.3 | 0.000 | 0.050 | 0.050 | 0.949 | 0.983 | 0.721 | 0.600 |
|      | 0.6 | 0.000 | 0.050 | 0.050 | 0.949 | 1.473 | 0.811 | 0.713 |
|      | 1.0 | 0.000 | 0.050 | 0.050 | 0.950 | 2.061 | 0.859 | 0.845 |
| 0.0  | 0.1 | 0.000 | 0.050 | 0.050 | 0.949 | 0.570 | 0.544 | 0.497 |
|      | 0.3 | 0.000 | 0.050 | 0.050 | 0.949 | 0.892 | 0.698 | 0.603 |
|      | 0.6 | 0.000 | 0.050 | 0.050 | 0.949 | 1.340 | 0.802 | 0.733 |
|      | 1.0 | 0.000 | 0.050 | 0.050 | 0.950 | 1.957 | 0.859 | 0.862 |
| 0.3  | 0.1 | 0.000 | 0.050 | 0.050 | 0.949 | 0.539 | 0.524 | 0.486 |
|      | 0.3 | 0.000 | 0.050 | 0.050 | 0.949 | 0.809 | 0.680 | 0.599 |
|      | 0.6 | 0.000 | 0.050 | 0.050 | 0.949 | 1.165 | 0.789 | 0.720 |
|      | 1.0 | 0.000 | 0.050 | 0.050 | 0.950 | 1.783 | 0.850 | 0.847 |
| 0.5  | 0.1 | 0.000 | 0.050 | 0.050 | 0.949 | 0.524 | 0.512 | 0.478 |
|      | 0.3 | 0.000 | 0.050 | 0.050 | 0.949 | 0.760 | 0.662 | 0.585 |
|      | 0.6 | 0.000 | 0.050 | 0.050 | 0.949 | 1.075 | 0.770 | 0.699 |
|      | 1.0 | 0.000 | 0.050 | 0.050 | 0.950 | 1.625 | 0.836 | 0.824 |

Table S2. Simulation results under additive errors in  $Y^*$  and  $X^*$  for  $r = 0.3$  and  $p = 0.6$  with varying second phase sample sizes. Bias and SE are, respectively, the empirical bias and standard error of the parameter estimator; SEE is the empirical mean of the standard error estimator; CP is the coverage probability of the 95% confidence interval; and RE is the efficiency relative to that of the SMLE. Each entry is based on 10,000 replicates

| $n_2$ | MBE    |       |       |       |       | CCE    |       |       |       |       | SMLE   |       |       |       |
|-------|--------|-------|-------|-------|-------|--------|-------|-------|-------|-------|--------|-------|-------|-------|
|       | Bias   | SE    | SEE   | CP    | RE    | Bias   | SE    | SEE   | CP    | RE    | Bias   | SE    | SEE   | CP    |
| 25    | -0.027 | 0.193 | 0.169 | 0.944 | 0.625 | -0.003 | 0.181 | 0.141 | 0.868 | 0.711 | -0.005 | 0.152 | 0.138 | 0.823 |
| 50    | -0.013 | 0.125 | 0.117 | 0.950 | 0.819 | -0.001 | 0.123 | 0.107 | 0.905 | 0.856 | -0.008 | 0.114 | 0.115 | 0.915 |
| 100   | -0.006 | 0.089 | 0.086 | 0.949 | 0.820 | -0.001 | 0.084 | 0.079 | 0.931 | 0.911 | -0.005 | 0.080 | 0.083 | 0.951 |
| 200   | -0.002 | 0.067 | 0.066 | 0.949 | 0.718 | -0.001 | 0.061 | 0.058 | 0.938 | 0.873 | -0.001 | 0.057 | 0.056 | 0.944 |
| 300   | -0.001 | 0.059 | 0.059 | 0.952 | 0.648 | 0.000  | 0.050 | 0.049 | 0.945 | 0.907 | 0.000  | 0.047 | 0.046 | 0.943 |

Table S3. Simulation results under the model  $Y = 0.3 + 0.4X_a + 0.5X_b + \epsilon$  when there are additive errors in  $Y^*$  and  $X_a^*$  and simple random sampling is used in the second phase. Bias and SE are, respectively, the empirical bias and standard error of the parameter estimator; SEE is the empirical mean of the standard error estimator; CP is the coverage probability of the 95% confidence interval; and RE is the efficiency relative to that of the SMLE. Each entry is based on 10,000 replicates

| $\tau$ | $r$ | $p$ | Covariate | MBE   |       |       |       |       | CCE    |       |       |       |       | SMLE   |       |       |       |
|--------|-----|-----|-----------|-------|-------|-------|-------|-------|--------|-------|-------|-------|-------|--------|-------|-------|-------|
|        |     |     |           | Bias  | SE    | SEE   | CP    | RE    | Bias   | SE    | SEE   | CP    | RE    | Bias   | SE    | SEE   | CP    |
| 0.5    | 0.3 | 0.6 | $X_a$     | 0.000 | 0.042 | 0.042 | 0.950 | 0.810 | 0.000  | 0.040 | 0.040 | 0.947 | 0.888 | -0.002 | 0.038 | 0.038 | 0.948 |
|        |     |     | $X_b$     | 0.000 | 0.081 | 0.082 | 0.954 | 1.081 | 0.000  | 0.084 | 0.084 | 0.945 | 1.010 | 0.000  | 0.084 | 0.084 | 0.945 |
|        | 1.0 |     | $X_a$     | 0.001 | 0.044 | 0.044 | 0.949 | 0.764 | 0.000  | 0.041 | 0.041 | 0.948 | 0.887 | -0.002 | 0.039 | 0.038 | 0.948 |
|        |     |     | $X_b$     | 0.000 | 0.086 | 0.087 | 0.951 | 1.033 | -0.001 | 0.087 | 0.087 | 0.950 | 1.005 | -0.001 | 0.087 | 0.087 | 0.950 |
|        | 0.5 | 0.6 | $X_a$     | 0.000 | 0.042 | 0.042 | 0.949 | 0.811 | 0.000  | 0.040 | 0.040 | 0.948 | 0.883 | -0.001 | 0.038 | 0.038 | 0.950 |
|        |     |     | $X_b$     | 0.000 | 0.080 | 0.081 | 0.953 | 1.079 | 0.000  | 0.083 | 0.083 | 0.946 | 1.006 | 0.000  | 0.083 | 0.083 | 0.946 |
|        | 1.0 |     | $X_a$     | 0.001 | 0.044 | 0.043 | 0.948 | 0.769 | 0.000  | 0.041 | 0.041 | 0.948 | 0.882 | -0.001 | 0.039 | 0.038 | 0.948 |
|        |     |     | $X_b$     | 0.000 | 0.084 | 0.085 | 0.950 | 1.042 | -0.001 | 0.086 | 0.086 | 0.950 | 1.004 | -0.001 | 0.086 | 0.086 | 0.950 |
| 1.0    | 0.3 | 0.6 | $X_a$     | 0.000 | 0.046 | 0.046 | 0.949 | 0.721 | 0.000  | 0.042 | 0.041 | 0.947 | 0.866 | -0.002 | 0.039 | 0.039 | 0.947 |
|        |     |     | $X_b$     | 0.000 | 0.087 | 0.089 | 0.953 | 1.043 | 0.000  | 0.089 | 0.088 | 0.946 | 1.006 | 0.000  | 0.089 | 0.088 | 0.945 |
|        | 1.0 |     | $X_a$     | 0.001 | 0.050 | 0.049 | 0.948 | 0.626 | 0.000  | 0.043 | 0.042 | 0.947 | 0.849 | -0.002 | 0.040 | 0.039 | 0.945 |
|        |     |     | $X_b$     | 0.000 | 0.096 | 0.097 | 0.950 | 0.951 | -0.001 | 0.093 | 0.092 | 0.950 | 1.015 | -0.001 | 0.093 | 0.093 | 0.951 |
|        | 0.5 | 0.6 | $X_a$     | 0.000 | 0.045 | 0.045 | 0.949 | 0.735 | 0.000  | 0.042 | 0.041 | 0.948 | 0.866 | -0.001 | 0.039 | 0.038 | 0.948 |
|        |     |     | $X_b$     | 0.000 | 0.085 | 0.087 | 0.953 | 1.058 | 0.000  | 0.088 | 0.087 | 0.947 | 1.004 | 0.000  | 0.088 | 0.087 | 0.946 |
|        | 1.0 |     | $X_a$     | 0.001 | 0.049 | 0.048 | 0.950 | 0.648 | 0.000  | 0.043 | 0.042 | 0.948 | 0.852 | -0.001 | 0.039 | 0.039 | 0.947 |
|        |     |     | $X_b$     | 0.000 | 0.092 | 0.093 | 0.949 | 0.981 | -0.001 | 0.091 | 0.091 | 0.949 | 1.011 | -0.001 | 0.092 | 0.091 | 0.952 |

Table S4. Simulation results under the model  $Y = 0.3 + 0.4X_a + 0.5X_b + \epsilon$  when there are additive errors in  $Y^*$  and  $X_a^*$  and stratified simple random sampling is used in the second phase. Bias and SE are, respectively, the empirical bias and standard error of the parameter estimator; SEE is the empirical mean of the standard error estimator; CP is the coverage probability of the 95% confidence interval; and RE is the efficiency relative to that of the SMLE. Each entry is based on 10,000 replicates

| $\tau$ | $r$ | $p$ | Covariate | MBE    |       |       |       |       | CCE    |       |       |       |       | SMLE   |       |       |       |
|--------|-----|-----|-----------|--------|-------|-------|-------|-------|--------|-------|-------|-------|-------|--------|-------|-------|-------|
|        |     |     |           | Bias   | SE    | SEE   | CP    | RE    | Bias   | SE    | SEE   | CP    | RE    | Bias   | SE    | SEE   | CP    |
| 0.5    | 0.3 | 0.6 | $X_a$     | 0.000  | 0.044 | 0.043 | 0.945 | 0.795 | 0.000  | 0.041 | 0.040 | 0.945 | 0.932 | -0.002 | 0.039 | 0.039 | 0.947 |
|        |     |     | $X_b$     | 0.000  | 0.083 | 0.082 | 0.946 | 0.943 | 0.000  | 0.080 | 0.073 | 0.923 | 1.005 | 0.000  | 0.080 | 0.079 | 0.947 |
|        | 1.0 |     | $X_a$     | 0.000  | 0.045 | 0.045 | 0.947 | 0.785 | 0.001  | 0.042 | 0.041 | 0.945 | 0.884 | -0.002 | 0.040 | 0.039 | 0.946 |
|        |     |     | $X_b$     | 0.001  | 0.087 | 0.087 | 0.950 | 0.856 | 0.000  | 0.080 | 0.074 | 0.929 | 1.001 | 0.000  | 0.080 | 0.080 | 0.950 |
|        | 0.5 | 0.6 | $X_a$     | 0.000  | 0.044 | 0.043 | 0.945 | 0.799 | -0.009 | 0.041 | 0.040 | 0.936 | 0.936 | -0.001 | 0.039 | 0.039 | 0.946 |
|        |     |     | $X_b$     | 0.000  | 0.082 | 0.081 | 0.947 | 0.966 | 0.000  | 0.080 | 0.072 | 0.921 | 1.005 | 0.000  | 0.080 | 0.079 | 0.948 |
|        | 1.0 |     | $X_a$     | -0.001 | 0.044 | 0.044 | 0.947 | 0.791 | -0.012 | 0.042 | 0.041 | 0.934 | 0.889 | -0.002 | 0.039 | 0.039 | 0.946 |
|        |     |     | $X_b$     | 0.001  | 0.085 | 0.085 | 0.950 | 0.890 | 0.000  | 0.080 | 0.074 | 0.927 | 1.000 | 0.000  | 0.080 | 0.080 | 0.950 |
| 1.0    | 0.3 | 0.6 | $X_a$     | 0.000  | 0.046 | 0.045 | 0.943 | 0.739 | 0.002  | 0.043 | 0.042 | 0.945 | 0.850 | -0.002 | 0.040 | 0.039 | 0.946 |
|        |     |     | $X_b$     | 0.000  | 0.089 | 0.089 | 0.948 | 0.834 | 0.000  | 0.081 | 0.075 | 0.930 | 1.006 | 0.000  | 0.081 | 0.080 | 0.948 |
|        | 1.0 |     | $X_a$     | 0.000  | 0.048 | 0.048 | 0.949 | 0.697 | 0.003  | 0.045 | 0.044 | 0.945 | 0.797 | -0.002 | 0.040 | 0.039 | 0.945 |
|        |     |     | $X_b$     | 0.001  | 0.097 | 0.097 | 0.950 | 0.703 | 0.000  | 0.081 | 0.078 | 0.937 | 1.000 | 0.000  | 0.081 | 0.081 | 0.950 |
|        | 0.5 | 0.6 | $X_a$     | 0.000  | 0.046 | 0.045 | 0.944 | 0.748 | -0.011 | 0.043 | 0.042 | 0.935 | 0.858 | -0.001 | 0.040 | 0.039 | 0.946 |
|        |     |     | $X_b$     | 0.000  | 0.087 | 0.087 | 0.948 | 0.869 | 0.000  | 0.081 | 0.075 | 0.928 | 1.003 | 0.000  | 0.081 | 0.080 | 0.948 |
|        | 1.0 |     | $X_a$     | -0.001 | 0.047 | 0.047 | 0.948 | 0.708 | -0.013 | 0.044 | 0.044 | 0.935 | 0.804 | -0.002 | 0.040 | 0.039 | 0.945 |
|        |     |     | $X_b$     | 0.001  | 0.094 | 0.093 | 0.950 | 0.751 | 0.000  | 0.081 | 0.077 | 0.935 | 1.000 | 0.000  | 0.081 | 0.081 | 0.950 |

Table S5. Simulation results under additive errors in  $Y^*$  and  $X^*$  for  $r = 0.3$  and  $p = 0.6$  when the distribution of  $\epsilon$  is not normal. Bias and SE are, respectively, the empirical bias and standard error of the parameter estimator; SEE is the empirical mean of the standard error estimator; CP is the coverage probability of the 95% confidence interval; and RE is the efficiency relative to that of the SMLE. Each entry is based on 10,000 replicates

| Distribution   | MBE    |       |       |       |       | CCE   |       |       |       |       | SMLE   |       |       |       |
|----------------|--------|-------|-------|-------|-------|-------|-------|-------|-------|-------|--------|-------|-------|-------|
|                | Bias   | SE    | SEE   | CP    | RE    | Bias  | SE    | SEE   | CP    | RE    | Bias   | SE    | SEE   | CP    |
| $t_3$          | -0.002 | 0.078 | 0.077 | 0.953 | 0.732 | 0.000 | 0.072 | 0.069 | 0.945 | 0.874 | -0.002 | 0.067 | 0.065 | 0.944 |
| $t_5$          | -0.001 | 0.064 | 0.064 | 0.949 | 0.665 | 0.000 | 0.055 | 0.055 | 0.949 | 0.896 | -0.001 | 0.052 | 0.051 | 0.946 |
| $t_{10}$       | 0.000  | 0.058 | 0.058 | 0.949 | 0.641 | 0.000 | 0.049 | 0.048 | 0.944 | 0.907 | 0.001  | 0.047 | 0.046 | 0.945 |
| $t_{15}$       | -0.003 | 0.057 | 0.057 | 0.951 | 0.651 | 0.001 | 0.047 | 0.047 | 0.947 | 0.931 | -0.001 | 0.046 | 0.044 | 0.942 |
| $t_{20}$       | -0.002 | 0.056 | 0.056 | 0.949 | 0.623 | 0.000 | 0.047 | 0.046 | 0.944 | 0.897 | -0.001 | 0.044 | 0.044 | 0.945 |
| $t_{30}$       | 0.000  | 0.056 | 0.056 | 0.952 | 0.611 | 0.000 | 0.046 | 0.045 | 0.946 | 0.936 | -0.001 | 0.044 | 0.043 | 0.947 |
| Uniform(-1, 1) | -0.002 | 0.044 | 0.044 | 0.953 | 0.396 | 0.000 | 0.027 | 0.027 | 0.949 | 1.007 | 0.000  | 0.027 | 0.027 | 0.941 |
| Uniform(-2, 2) | -0.002 | 0.059 | 0.059 | 0.951 | 0.691 | 0.000 | 0.051 | 0.050 | 0.948 | 0.951 | -0.001 | 0.049 | 0.048 | 0.944 |

Table S6. Simulation results for LSE under additive errors in  $Y^*$  and  $X^*$  when residual-dependent sampling is used in the second phase. Bias and SE are, respectively, the empirical bias and standard error of the parameter estimator; SEE is the empirical mean of the standard error estimator; and CP is the coverage probability of the 95% confidence interval. Each entry is based on 10,000 replicates

| $r$  | $p$ | Bias   | SE    | SEE   | CP    |
|------|-----|--------|-------|-------|-------|
| -0.5 | 0.1 | 0.090  | 0.049 | 0.072 | 0.854 |
|      | 0.3 | 0.190  | 0.053 | 0.068 | 0.142 |
|      | 0.6 | 0.232  | 0.051 | 0.063 | 0.017 |
|      | 1.0 | 0.222  | 0.050 | 0.058 | 0.016 |
| -0.3 | 0.1 | 0.071  | 0.049 | 0.073 | 0.930 |
|      | 0.3 | 0.153  | 0.053 | 0.069 | 0.368 |
|      | 0.6 | 0.191  | 0.053 | 0.064 | 0.107 |
|      | 1.0 | 0.180  | 0.052 | 0.060 | 0.113 |
| 0.0  | 0.1 | 0.041  | 0.048 | 0.073 | 0.983 |
|      | 0.3 | 0.091  | 0.053 | 0.070 | 0.810 |
|      | 0.6 | 0.118  | 0.054 | 0.066 | 0.587 |
|      | 1.0 | 0.111  | 0.054 | 0.062 | 0.571 |
| 0.3  | 0.1 | 0.011  | 0.048 | 0.073 | 0.997 |
|      | 0.3 | 0.023  | 0.053 | 0.071 | 0.983 |
|      | 0.6 | 0.032  | 0.055 | 0.068 | 0.963 |
|      | 1.0 | 0.030  | 0.055 | 0.064 | 0.954 |
| 0.5  | 0.1 | -0.010 | 0.047 | 0.073 | 0.997 |
|      | 0.3 | -0.023 | 0.053 | 0.071 | 0.986 |
|      | 0.6 | -0.032 | 0.055 | 0.069 | 0.965 |
|      | 1.0 | -0.034 | 0.056 | 0.065 | 0.950 |

Table S7. Simulation results under additive errors in  $Y^*$ ,  $X_1^*$ , and  $X_2^*$  when simple random sampling is used in the second phase. Bias and SE are, respectively, the empirical bias and standard error of the parameter estimator; SEE is the empirical mean of the standard error estimator; and CP is the coverage probability of the 95% confidence interval. Each entry is based on 10,000 replicates

| $r$ | $p$ | $X_1$  |       |       |       | $X_2$  |       |       |       |
|-----|-----|--------|-------|-------|-------|--------|-------|-------|-------|
|     |     | Bias   | SE    | SEE   | CP    | Bias   | SE    | SEE   | CP    |
| 0.0 | 0.1 | -0.003 | 0.035 | 0.034 | 0.945 | -0.002 | 0.036 | 0.035 | 0.941 |
|     | 0.3 | -0.005 | 0.039 | 0.038 | 0.940 | -0.005 | 0.039 | 0.038 | 0.943 |
|     | 0.6 | -0.009 | 0.042 | 0.041 | 0.938 | -0.010 | 0.042 | 0.041 | 0.935 |
|     | 1.0 | -0.012 | 0.045 | 0.044 | 0.935 | -0.012 | 0.044 | 0.044 | 0.939 |
| 0.3 | 0.1 | -0.001 | 0.035 | 0.034 | 0.942 | -0.001 | 0.035 | 0.034 | 0.943 |
|     | 0.3 | -0.003 | 0.038 | 0.037 | 0.948 | -0.003 | 0.039 | 0.037 | 0.940 |
|     | 0.6 | -0.005 | 0.041 | 0.041 | 0.942 | -0.005 | 0.042 | 0.041 | 0.941 |
|     | 1.0 | -0.006 | 0.044 | 0.043 | 0.940 | -0.005 | 0.044 | 0.043 | 0.944 |
| 0.5 | 0.1 | -0.001 | 0.035 | 0.034 | 0.946 | -0.001 | 0.034 | 0.034 | 0.945 |
|     | 0.3 | -0.001 | 0.038 | 0.037 | 0.945 | -0.001 | 0.037 | 0.037 | 0.948 |
|     | 0.6 | -0.002 | 0.040 | 0.040 | 0.946 | -0.002 | 0.041 | 0.040 | 0.943 |
|     | 1.0 | -0.002 | 0.042 | 0.042 | 0.946 | -0.001 | 0.043 | 0.042 | 0.946 |
